# Supplementary material for: Validation of Diet ID™ in Predicting Nutrient Intake Compared to Dietary Recalls, Skin Carotenoid Scores, and Plasma Carotenoids in University Students
Source: MDPI journal article supplement (doi:10.3390/nu15020409), 2023-01-13

Figure S1. Agreement between NDSR and Diet ID for HEI-2015 Score

3/42 = 7.14% outside the limits of agreement

Mean Diff = 20.20+ -0.46\*Average

Limits +/- 2.46\*( 5.92 + 0.06\*Average)

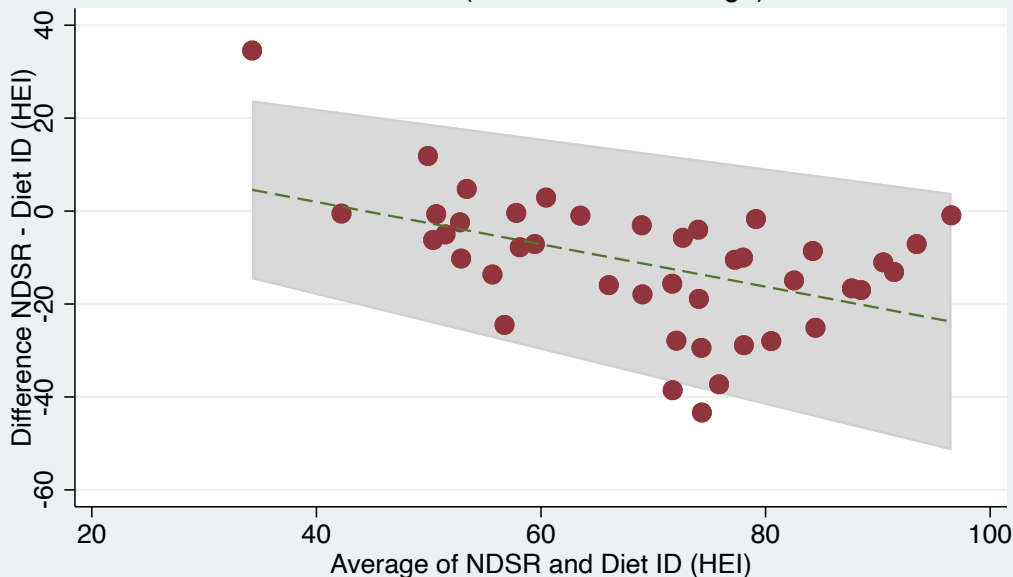

Figure S2. Agreement between NDSR and Diet ID for Calories

1/42 = 2.38% outside the limits of agreement

Mean Diff =  $-1021.58 + 0.35 \times \text{Average}$

Limits  $\pm 2.46 \times (18.37 + 0.23 \times \text{Average})$

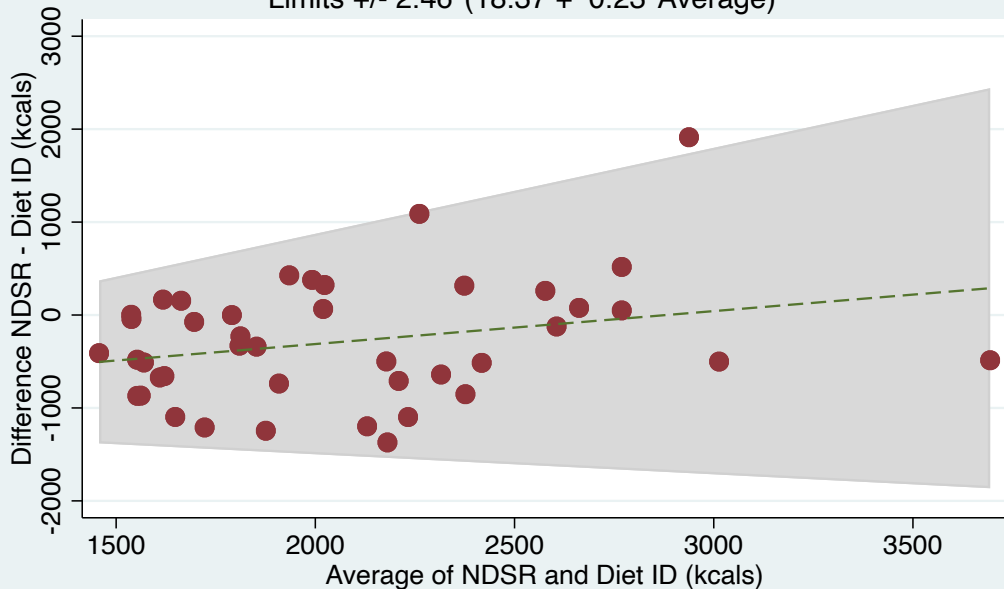

Figure S3. Agreement between NDSR and Diet ID for Protein

1/42 = 2.38% outside the limits of agreement

Mean Diff =  $18.42 + -0.41 \cdot \text{Average}$

Limits  $\pm 2.46 \cdot (-7.67 + 0.35 \cdot \text{Average})$

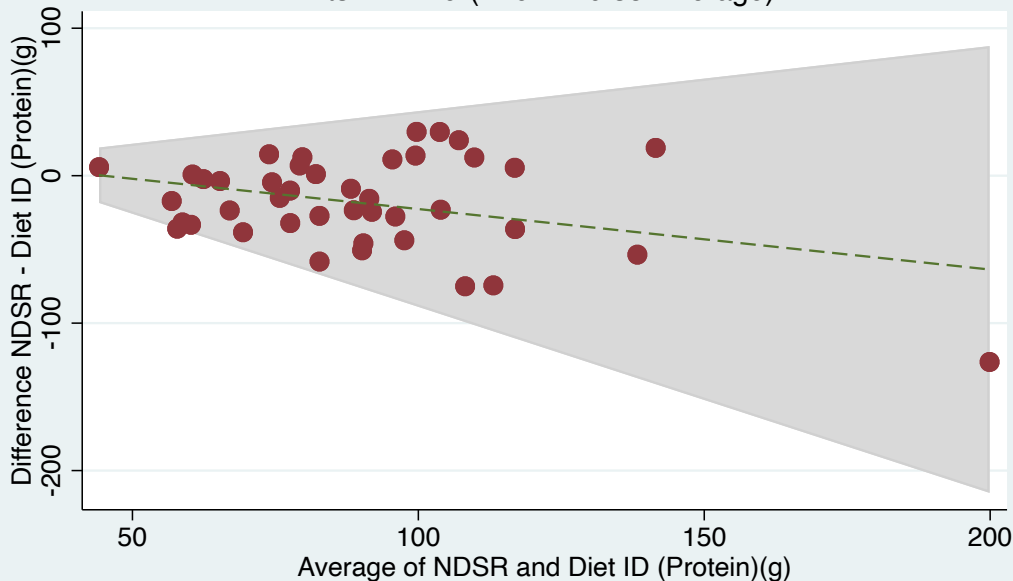

Figure S4. Agreement between NDSR and Diet ID for Carbohydrates

0/42 = 0.00% outside the limits of agreement

Mean Diff =  $-163.39 + 0.59 \times \text{Average}$

Limits  $\pm 2.46 \times (11.44 + 0.27 \times \text{Average})$

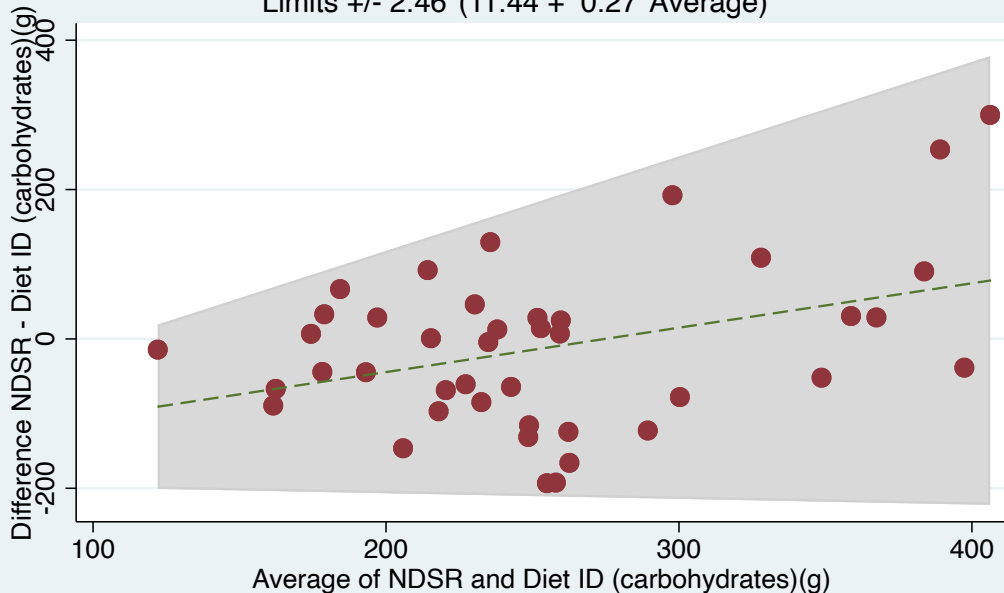

Figure S5. Agreement between NDSR and Diet ID for Fat

2/42 = 4.76% outside the limits of agreement

Mean Diff =  $-110.49 + 1.18 \times \text{Average}$

Limits  $\pm 2.46 \times (-37.82 + 0.85 \times \text{Average})$

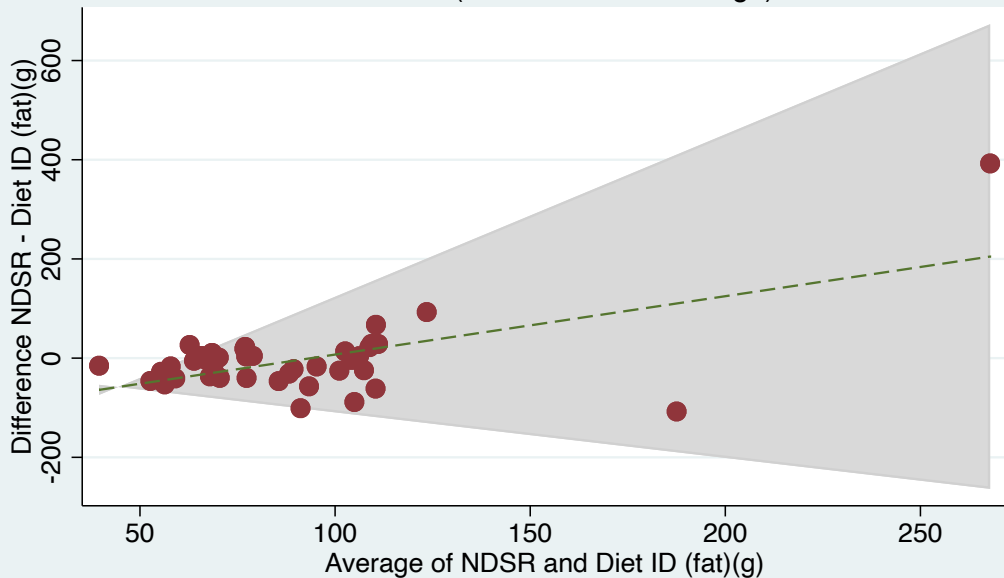

Figure S6. Agreement between NDSR and Diet ID for Cholesterol

1/42 = 2.38% outside the limits of agreement

Mean Diff = 144.71+ -0.60\*Average

Limits +/- 2.46\*(59.54 + 0.35\*Average)

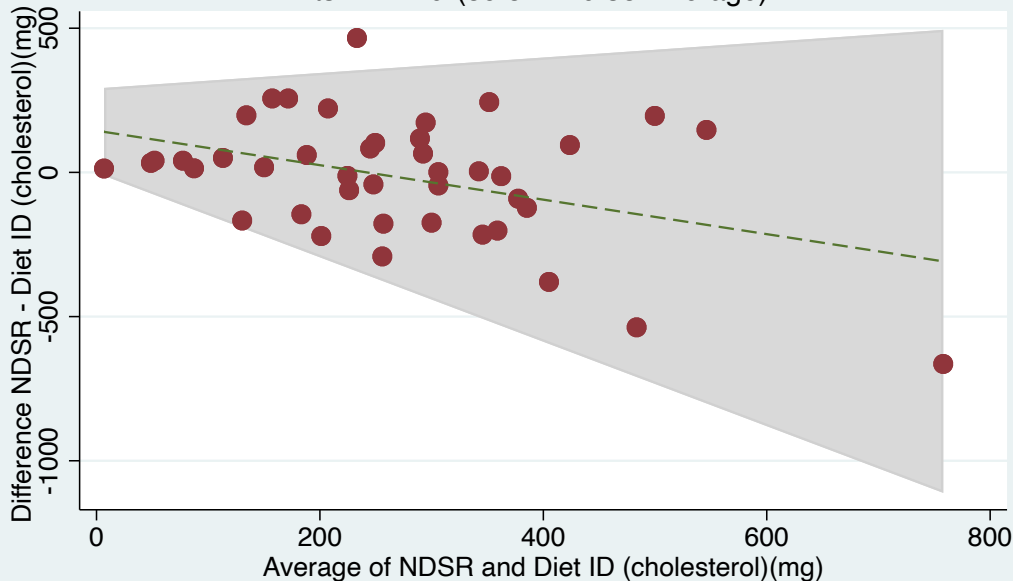

Figure S7. Agreement between NDSR and Diet ID for Vitamin A

2/42 = 4.76% outside the limits of agreement

Mean Diff =  $-323.40 + 0.02 \times \text{Average}$

Limits  $\pm 2.46 \times (253.52 + 0.25 \times \text{Average})$

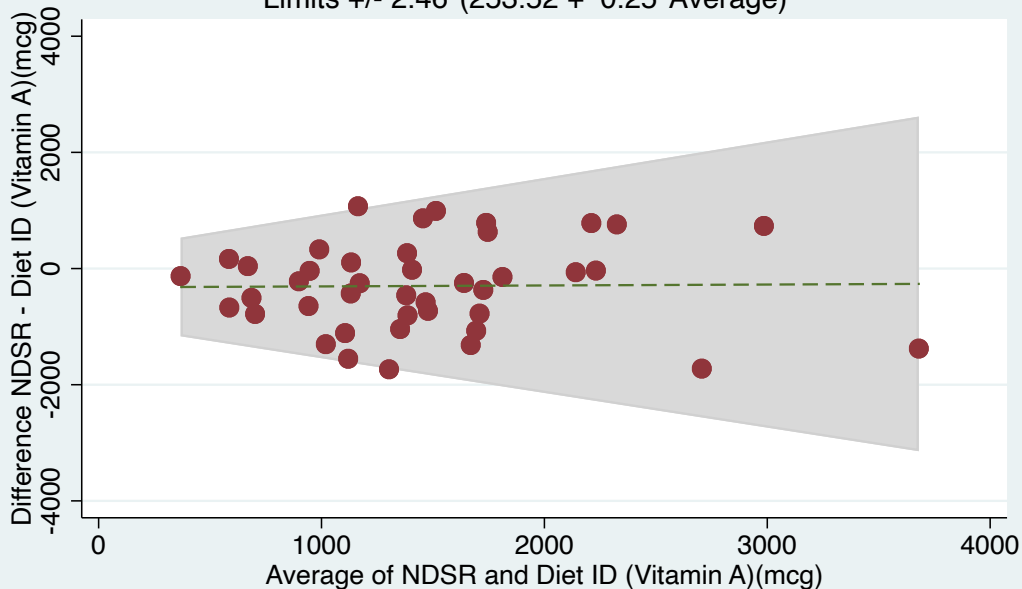

Figure S8. Agreement between NDSR and Diet ID for Total Carotenoids

$2/42 = 4.76\%$  outside the limits of agreement

Mean Diff =  $3695.06 - 1.04 \times \text{Average}$

Limits  $\pm 2.46 \times (6639.04 + 0.08 \times \text{Average})$

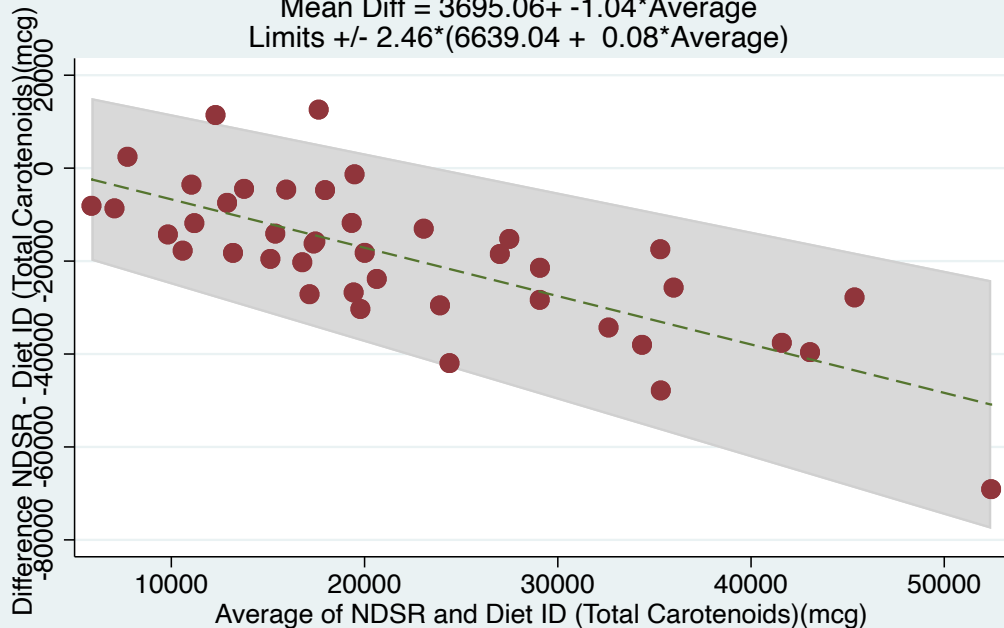

Figure S9. Agreement between NDSR and Diet ID for Alpha-carotene

2/42 = 4.76% outside the limits of agreement

Mean Diff =  $219.73 + -0.86 \times \text{Average}$

Limits  $\pm 2.46 \times (717.93 + 0.23 \times \text{Average})$

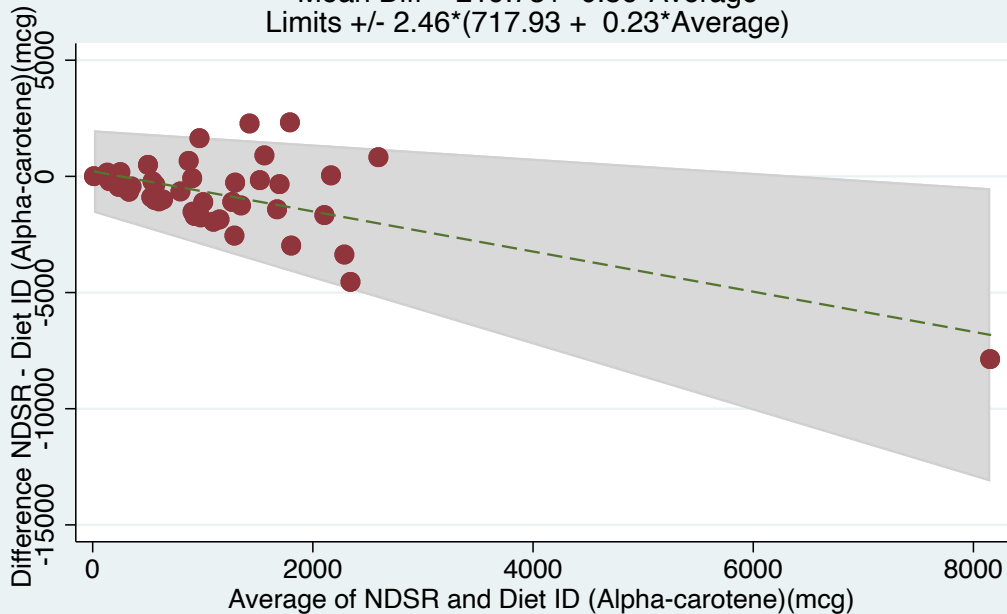

Figure S10. Agreement between NDSR and Diet ID for Beta-carotene

1/42 = 2.38% outside the limits of agreement

Mean Diff =  $-646.23 + -0.86 \times \text{Average}$

Limits  $\pm 2.46 \times (1497.33 + 0.27 \times \text{Average})$

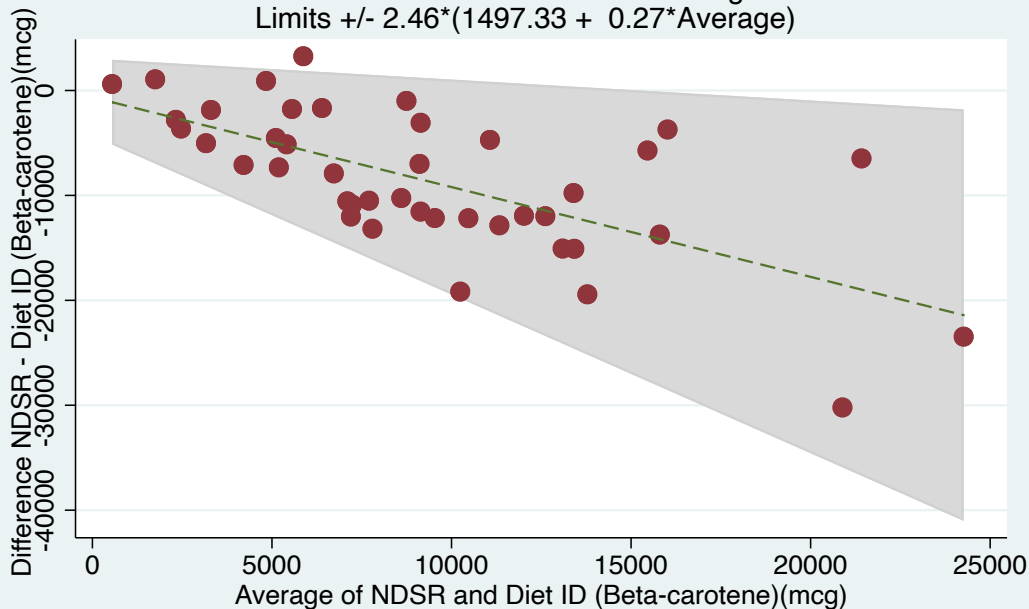

Figure S11. Agreement between NDSR and Diet ID for Lycopene

2/42 = 4.76% outside the limits of agreement

Mean Diff = -5394.95+ 0.34\*Average

Limits +/- 2.46\*(-398.54 + 0.82\*Average)

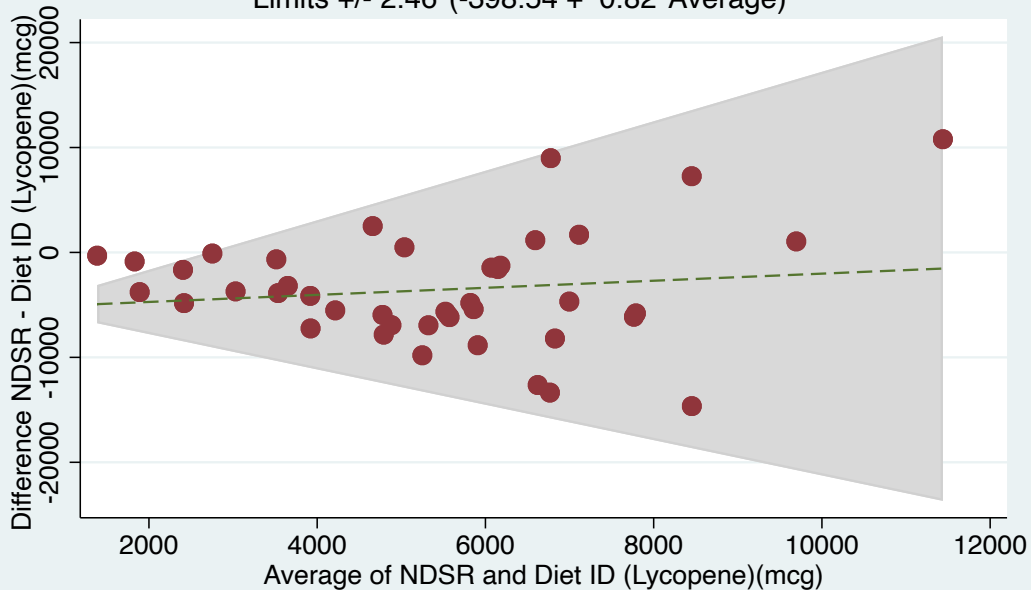

Figure S12. Agreement between NDSR and Diet ID for Lutein & Zeaxanth

2/42 = 4.76% outside the limits of agreement  
Mean Diff = 383.94+ -1.08\*Average  
Limits +/- 2.46\*(695.25 + 0.30\*Average)

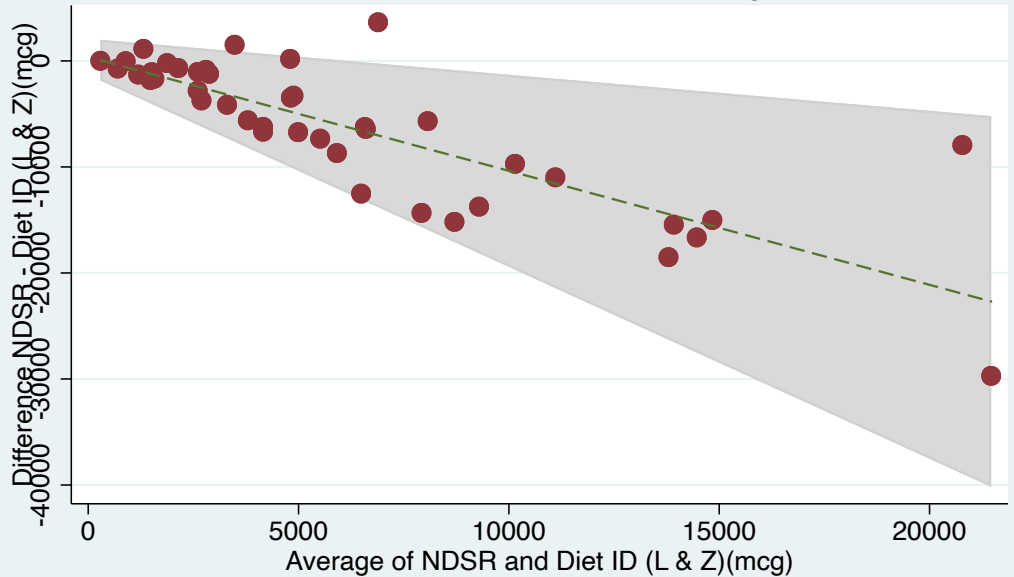

Figure S13. Agreement between NDSR and Diet ID for Fiber

0/42 = 0.00% outside the limits of agreement

Mean Diff =  $-56.36 + 1.47 \times \text{Average}$

Limits  $\pm 2.46 \times (15.78 + 0.42 \times \text{Average})$

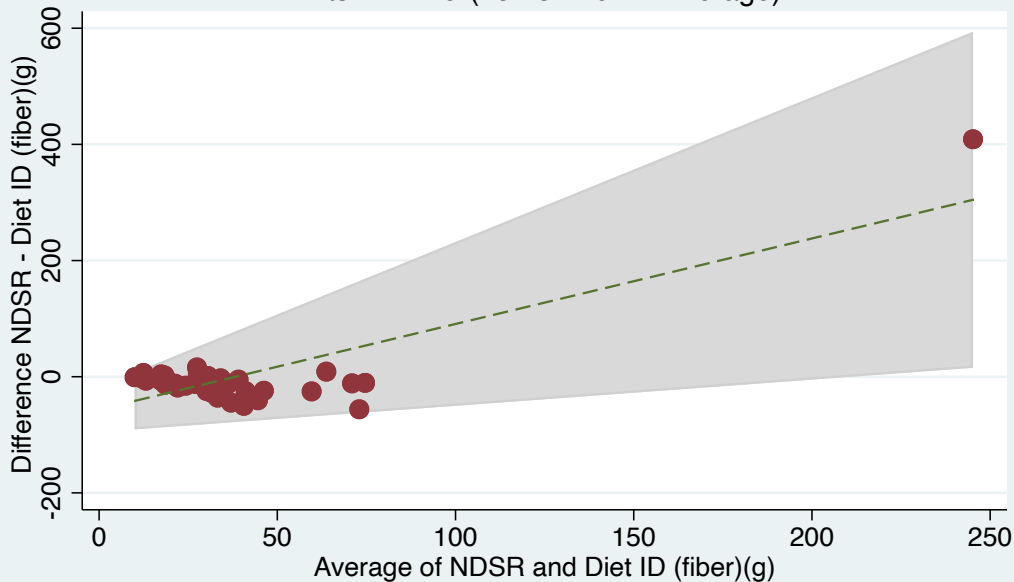

Figure S14. Agreement between NDSR and Diet ID for Calcium

1/42 = 2.38% outside the limits of agreement

Mean Diff = -284.82+ 0.05\*Average

Limits +/- 2.46\*(233.17 + 0.10\*Average)

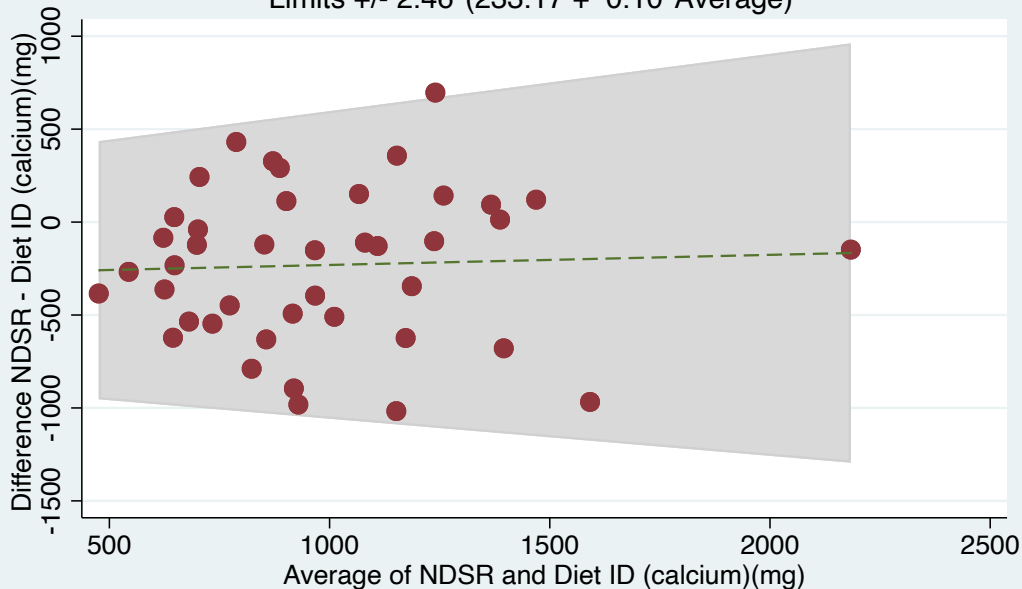

Figure S15. Agreement between NDSR and Diet ID for Vitamin C

2/42 = 4.76% outside the limits of agreement

Mean Diff = 50.01+ -0.91\*Average

Limits +/- 2.46\*(19.18 + 0.32\*Average)

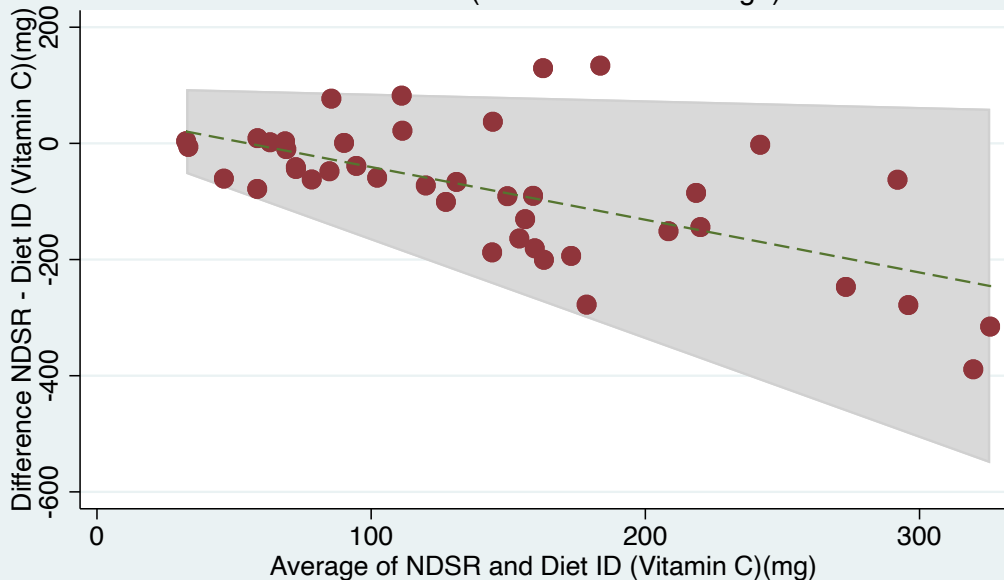

Figure S16. Agreement between NDSR and Diet ID (Vitamin D)

2/42 = 4.76% outside the limits of agreement

Mean Diff =  $-6.21 + 1.08 \times \text{Average}$

Limits  $\pm 2.46 \times (0.50 + 0.53 \times \text{Average})$

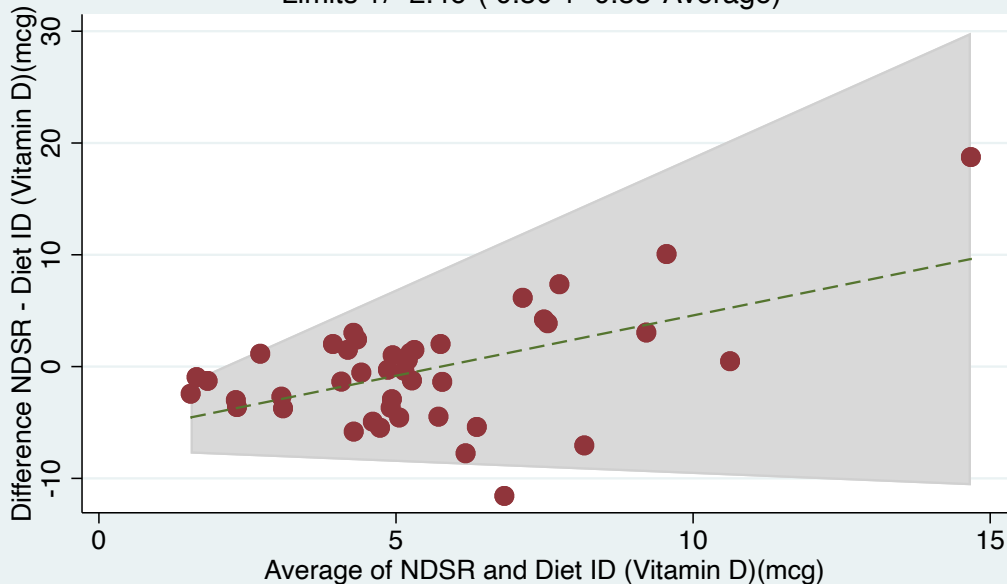

Figure S17. Agreement between NDSR and Diet ID for Vitamin E

0/42 = 0.00% outside the limits of agreement

Mean Diff = -5.48+ 0.02\*Average

Limits +/- 2.46\*(-0.74 + 0.56\*Average)

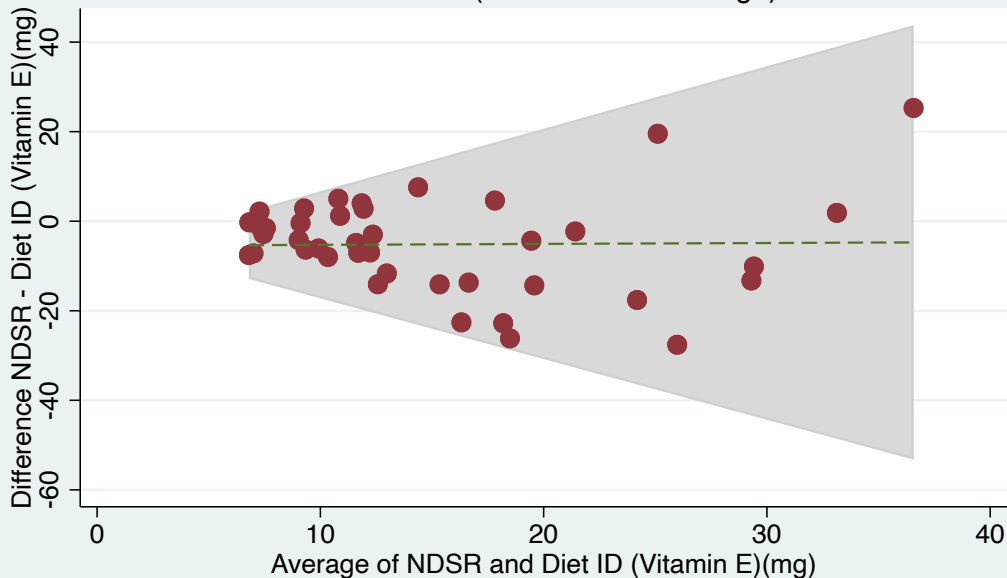

Figure S18. Agreement between NDSR and Diet ID (Sodium)

5/42 = 11.90% outside the limits of agreement

Mean Diff =  $-331.00 + 0.27 \times \text{Average}$

Limits  $\pm 2.46 \times (-57.57 + 0.29 \times \text{Average})$

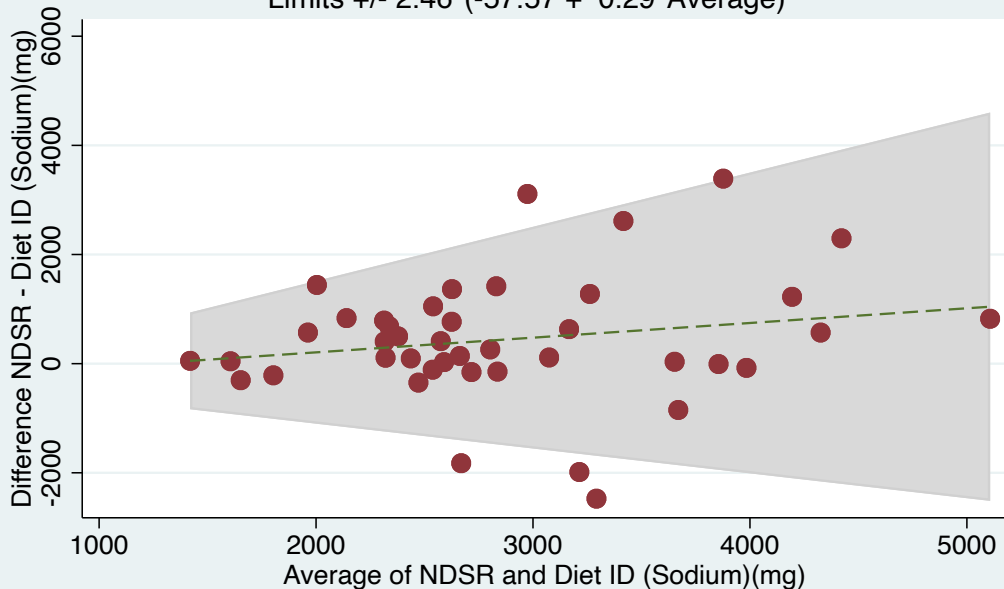

Figure S19. Agreement between NDSR and Diet ID for Potassium

1/42 = 2.38% outside the limits of agreement

Mean Diff = 246.27+ -0.46\*Average

Limits +/- 2.46\*(423.07 + 0.15\*Average)

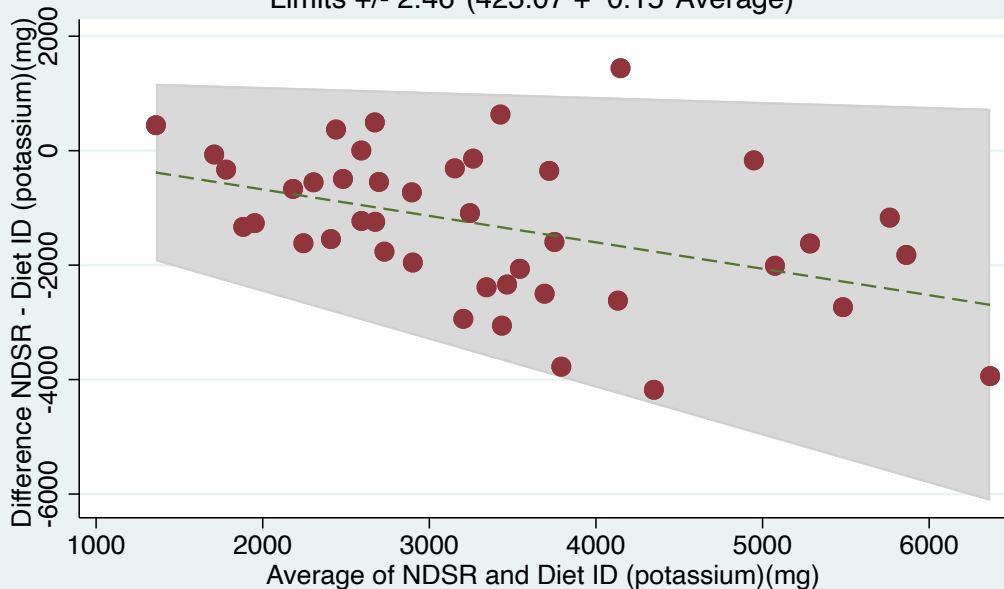

Figure S20. Agreement between NDSR and Diet ID for Folate

1/42 = 2.38% outside the limits of agreement

Mean Diff = 103.05+ -0.42\*Average

Limits +/- 2.46\*(73.59 + 0.20\*Average)

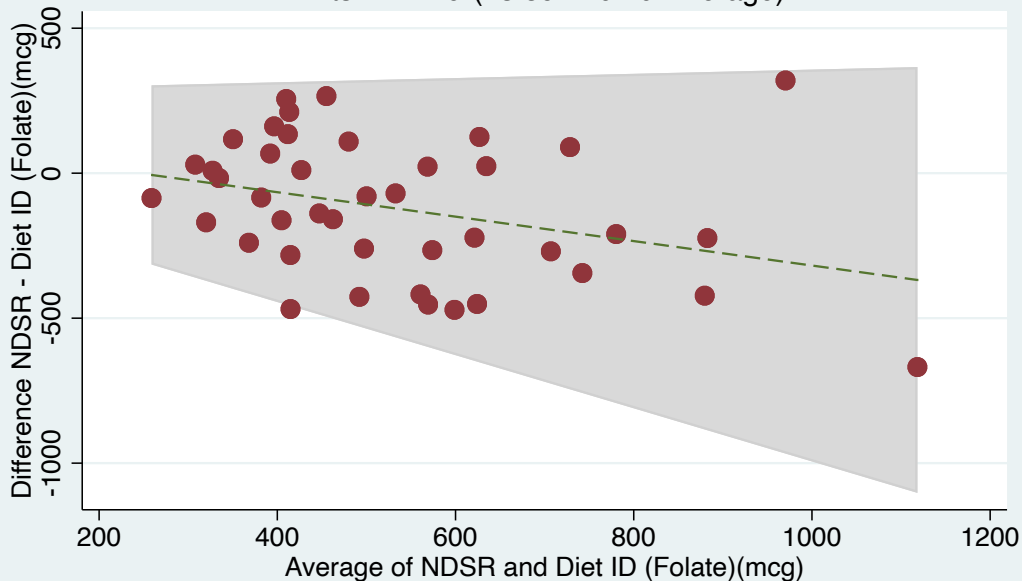

Figure S21. Agreement between NDSR and Diet ID for Iron

1/42 = 2.38% outside the limits of agreement

Mean Diff =  $-5.43 + 0.16 \cdot \text{Average}$

Limits  $\pm 2.46 \cdot (-0.65 + 0.37 \cdot \text{Average})$

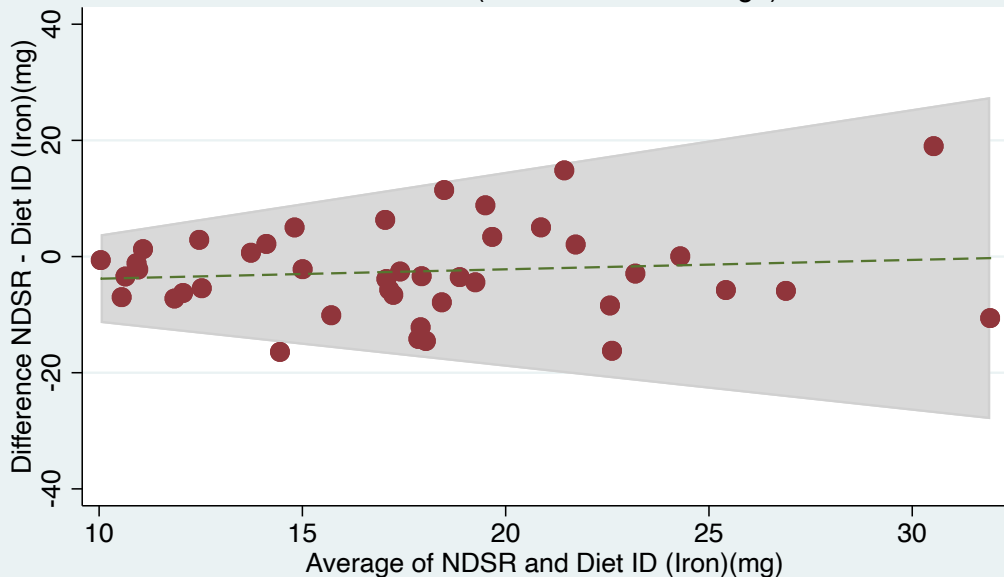

Figure S22. Agreement between NDSR and Diet ID for Vitamin B1

1/42 = 2.38% outside the limits of agreement

Mean Diff =  $-1.04 + 0.46 \cdot \text{Average}$

Limits  $\pm 2.46 \cdot (0.21 + 0.18 \cdot \text{Average})$

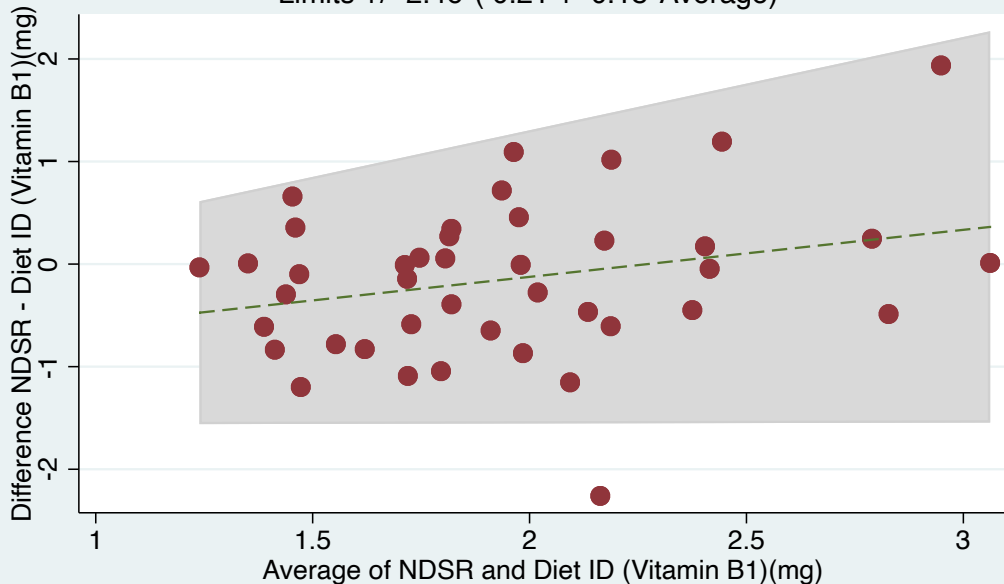

Figure S23. Agreement between NDSR and Diet ID for Vitamin B2

0/42 = 0.00% outside the limits of agreement

Mean Diff =  $-1.24 + 0.42 \times \text{Average}$

Limits  $\pm 2.46 \times (0.36 + 0.11 \times \text{Average})$

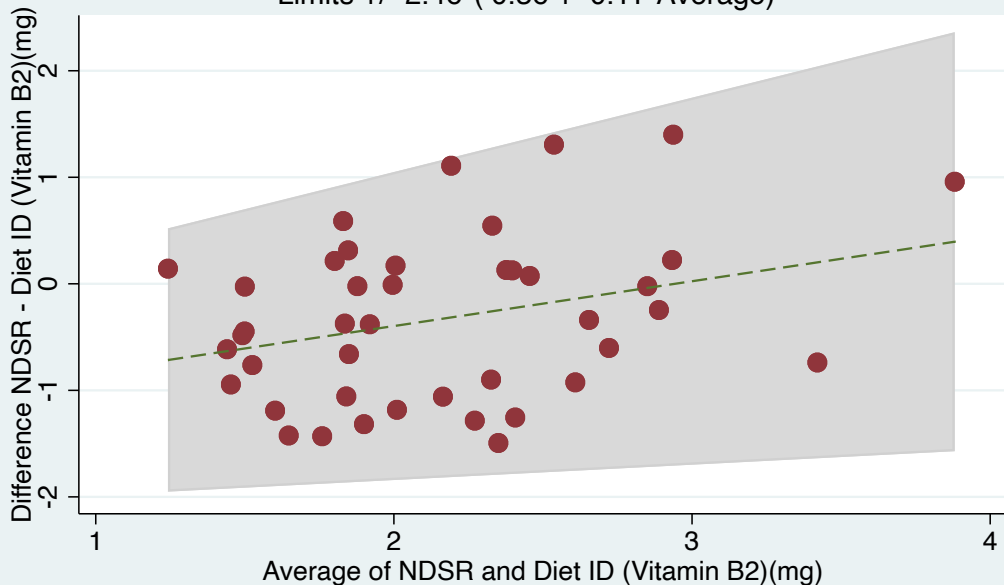

Figure S24. Agreement between NDSR and Diet ID for Vitamin B3

1/42 = 2.38% outside the limits of agreement

Mean Diff =  $1.94 + -0.20 \times \text{Average}$

Limits  $\pm 2.46 \times (-2.13 + 0.36 \times \text{Average})$

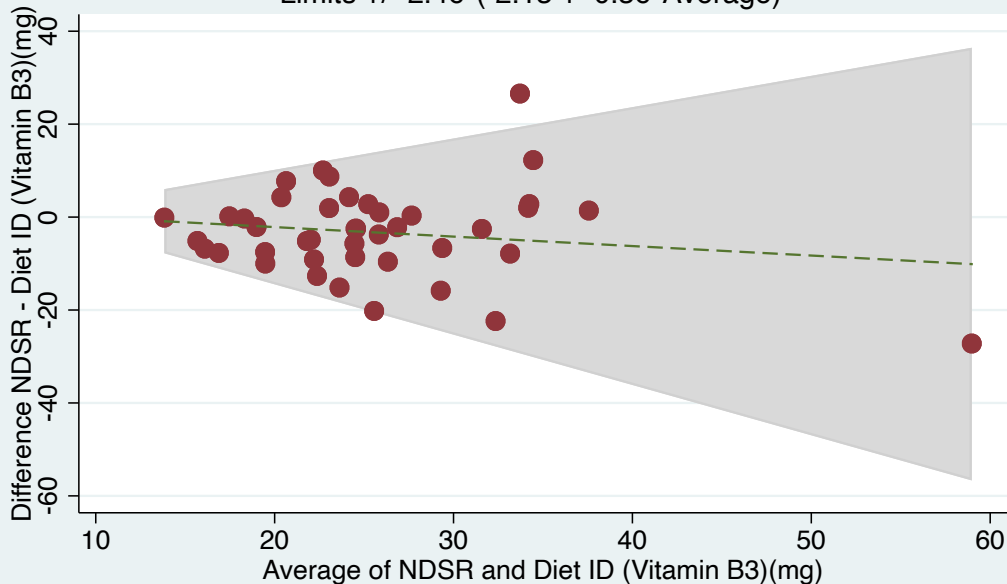

Figure S25. Agreement between NDSR and Diet ID for Vitamin B6

0/42 = 0.00% outside the limits of agreement

Mean Diff =  $0.18 + -0.32 \times \text{Average}$

Limits  $\pm 2.46 \times (0.13 + 0.22 \times \text{Average})$

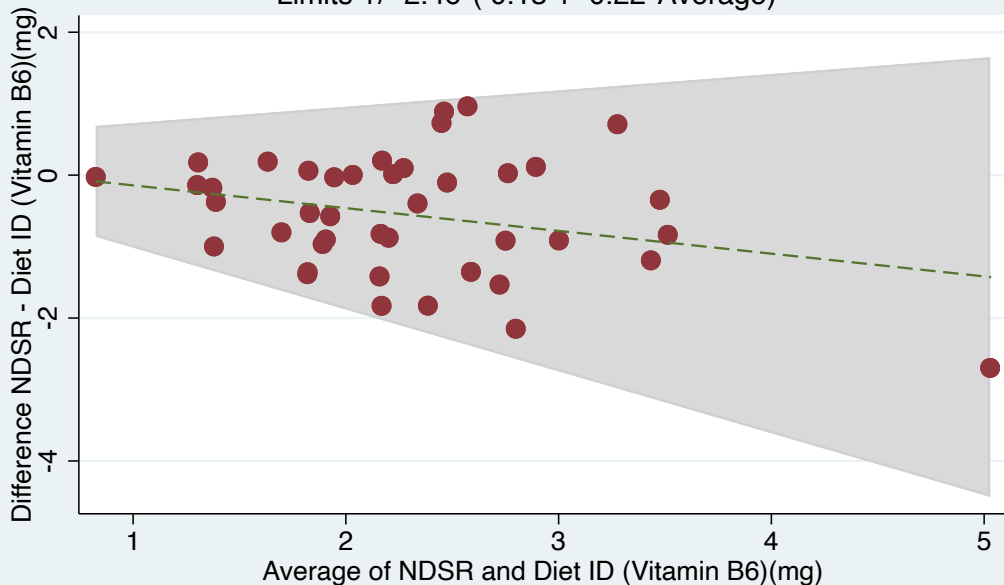

Figure S26. Agreement between NDSR and Diet ID for Vitamin B12

3/42 = 7.14% outside the limits of agreement

Mean Diff =  $0.54 + -0.30 \cdot \text{Average}$

Limits  $\pm 2.46 \cdot (-0.61 + 0.71 \cdot \text{Average})$

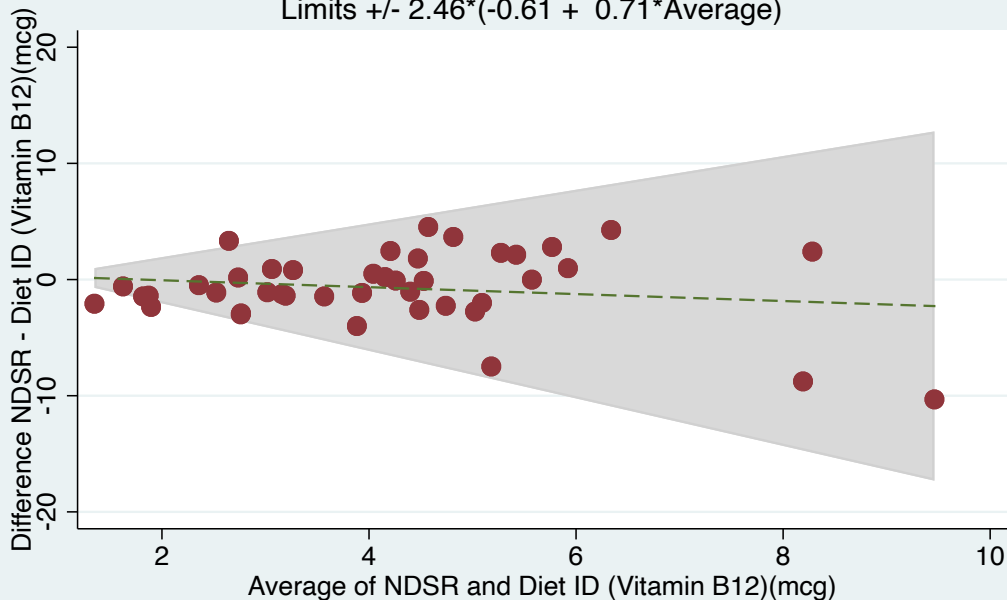

Supplement: s1 [file s1]
